# Supplementary material for: Ipa1 Improves Rice Drought Tolerance at Seedling Stage Mainly Through Activating Abscisic Acid Pathway
Source: Research Square preprint supplement (doi:10.21203/rs.3.rs-733123/v1), 2021-07-27
Supplement: Supplementary file 1 [file 1f12dd8507273217ba940d0b.docx]

***ipa1* improves rice drought tolerance at seedling stage mainly through activating abscisic acid pathway**

Menghao Zhu1,2, Yonggang He1,2, Mingqiang Zhu1, Ayaz Ahmad1, Shuang Xu1, Zijun He1, Shan Jiang1, Jinqiu Huang1, Zhihui Li1, Shaojia Liu1,2, Xin Hou1, Zhihong Zhang1,2,*

1State Key Laboratory of Hybrid Rice, College of Life Sciences, Wuhan University, Wuhan, 430072, China

2Ezhou Seed Technology Research Institute of Hubei Province, Ezhou, 436043, China

* Corresponding author

Phone: +86-13871491559

Fax: +86-27-68752095

E-mail: zzh@whu.edu.cn

**Supplementary table 1 Phenotypic characteristics of *IPA1* and *ipa1* NILs**

|  | **Tiller numbers** | **Leave numbers** | **Primary branch numbers** | **Secondary branch numbers** | **Spikelet numbers per panicle** |
| --- | --- | --- | --- | --- | --- |
| **NIL-*IPA1*** | **6.9±1.2** | **14.8±0.5** | **15.8±1.1** | **26.4±6.8** | **178.7±25.7** |
| **NIL-*ipa1*** | **1.4±0.6** | **11.3±0.5** | **20.9±1.3** | **50.4±7.8** | **276.9±24.6** |

Data was from 45 plants of three replications under natural condition in Wuhan, China, in 2017.Values are means ± SD.


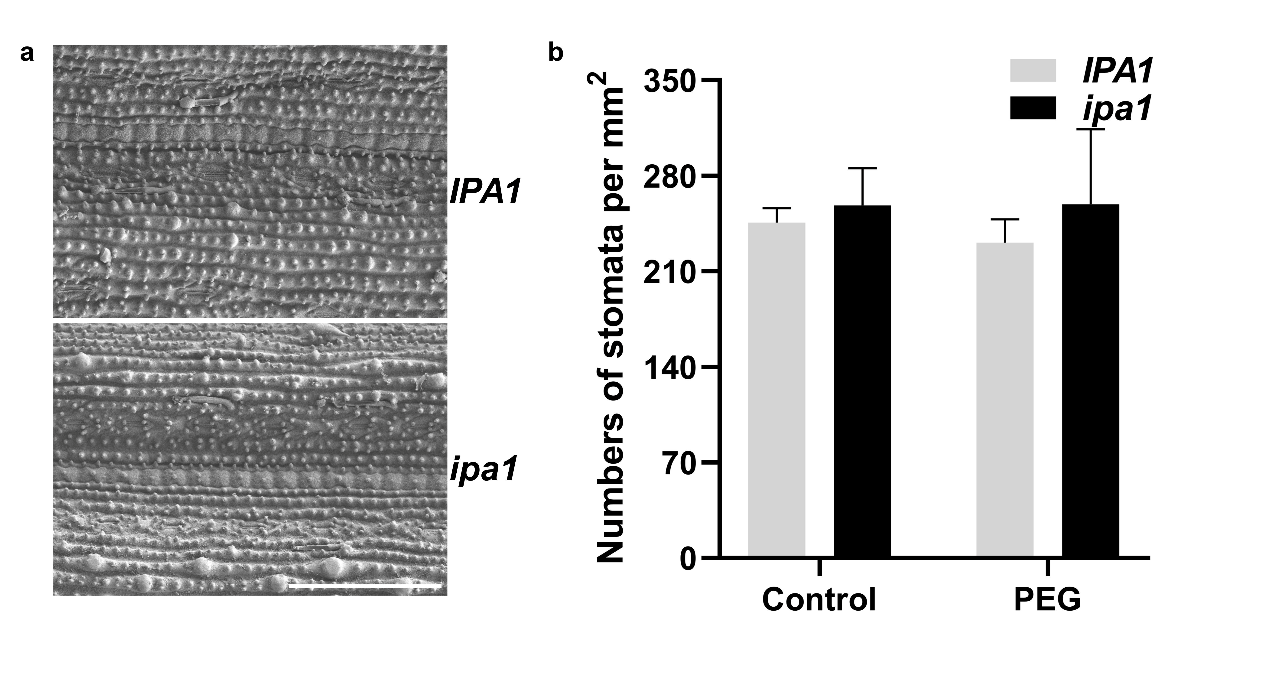
 **Supplementary Fig. 1** Stomatal density of the *IPA1*/*ipa1* seedlings. (a) Scanning electron microscopy (SEM) images of the *IPA1*/*ipa1* seedlings. Bar, 100 µm. (b) Numbers of stomata per mm2 in the *IPA1*/*ipa1* seedlings. Data represent the means ± SE (n=3).


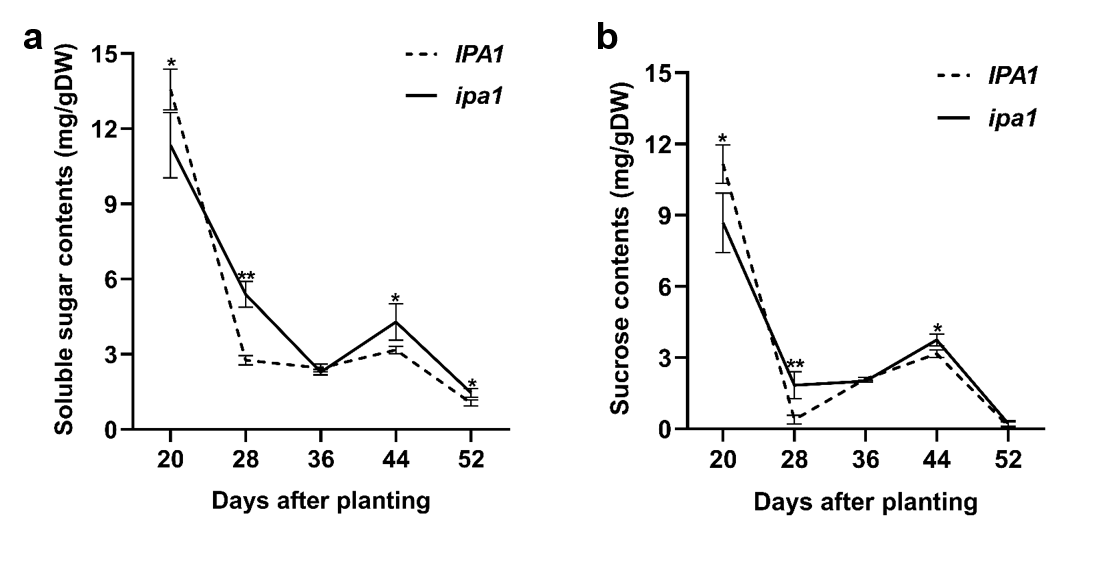
 **Supplementary Fig. 2** Contents of soluble sugar (a) and sucrose (b) in sheathes of the *IPA1*/*ipa1* seedlings. Data represent the means ± SE (n=3). **P*<0.05, *t*-test. ***P*<0.01, *t*-test.


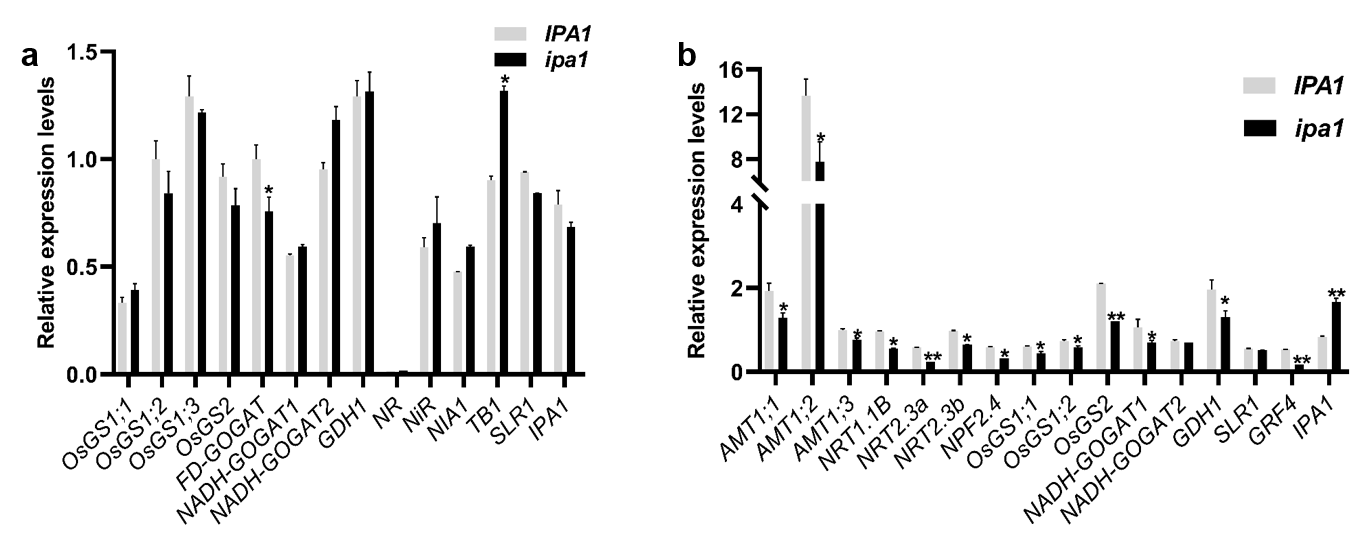
**Supplementary Fig. 3** Expression levels of the genes involved in nitrogen absorption, transport, assimilation and regulating nitrogen metabolism in both shoot (a) and root (b) of the *IPA1/ipa1* seedlings. Data represent the means ± SE (n=3). **P*<0.05, *t*-test. ***P*<0.01, *t*-test.


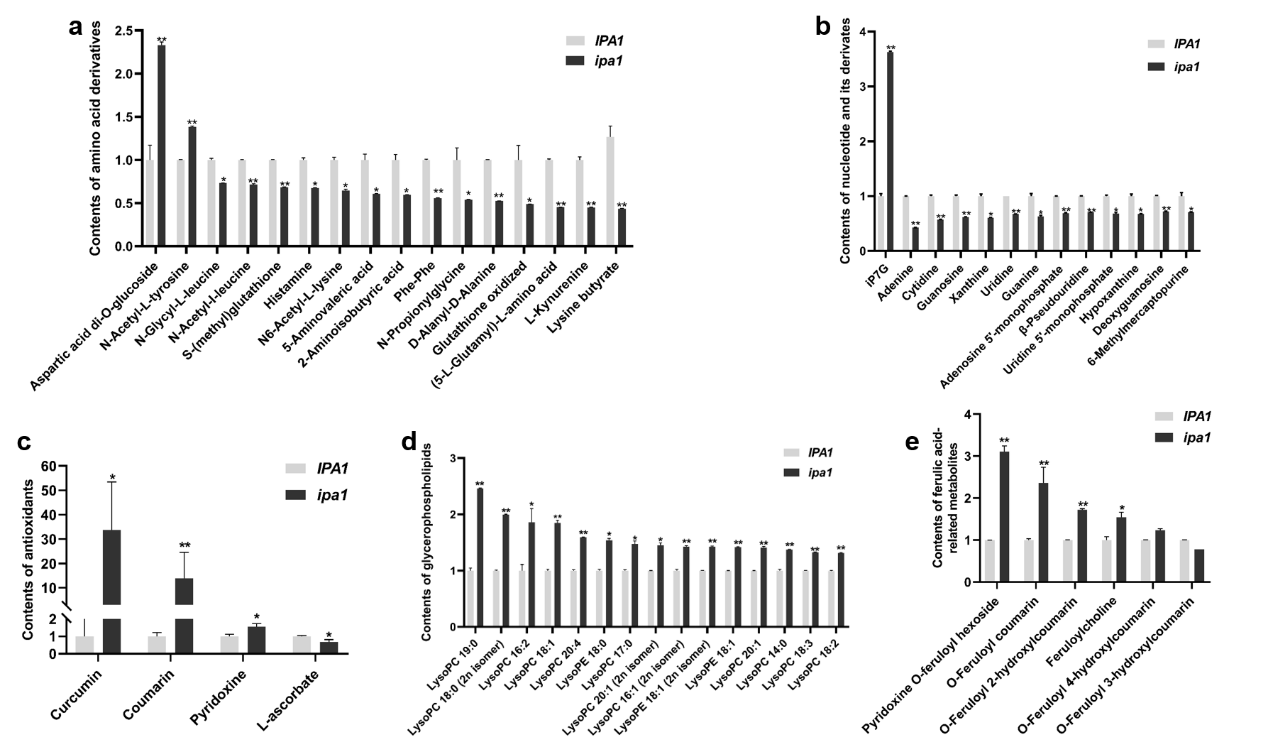


**Supplementary Fig. 4** Contents of amino acid derivatives (a), nucleotide and its derivatives (b), antioxidants (c), glycerolipids (d) and ferulic acid-related metabolites (e) in the *IPA1*/*ipa1* seedlings. Data represent the means ± SE (n=3). * VIP≥0.5, *P*<0.05, *t*-test. ** VIP≥0.5, *P*<0.01, *t*-test.


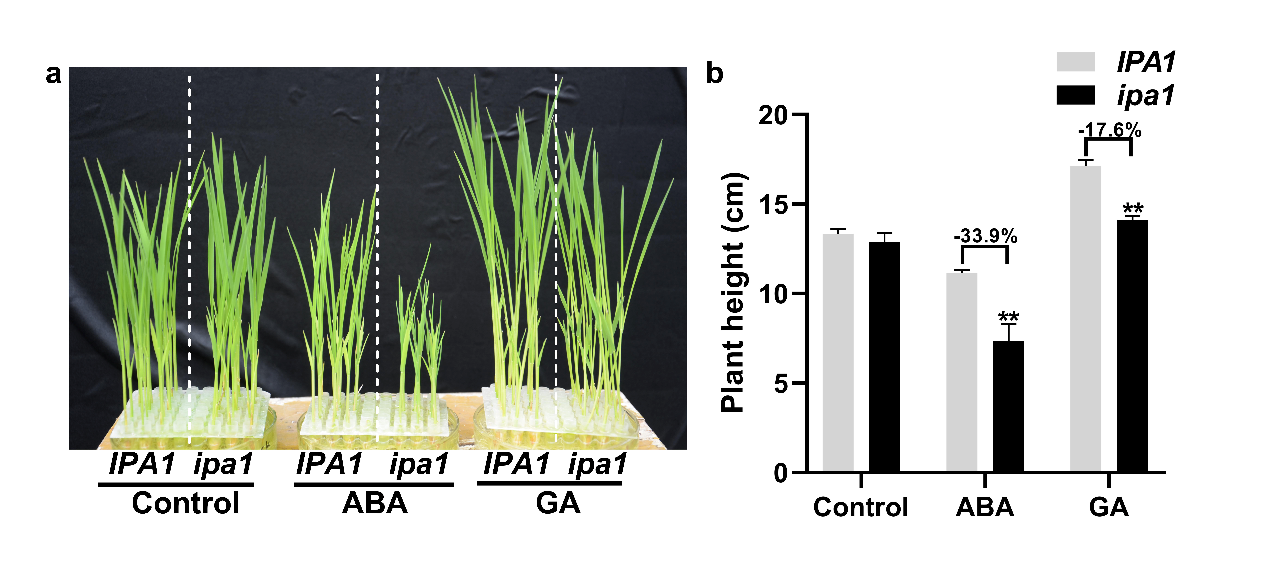


**Supplementary Fig. 5** Response of the *IPA1*/*ipa1* seedlings to ABA and GA3 treatments. (a) Phenotypes of the *IPA1/ipa1* seedlings treated by ABA and GA3 treatments, respectively. (b) Plant height of the *IPA1*/*ipa1* seedlings under ABA and GA3 treatments. Data represent the means ± SE (n=45). **P*<0.05, *t*-test. ***P*<0.01, *t*-test.


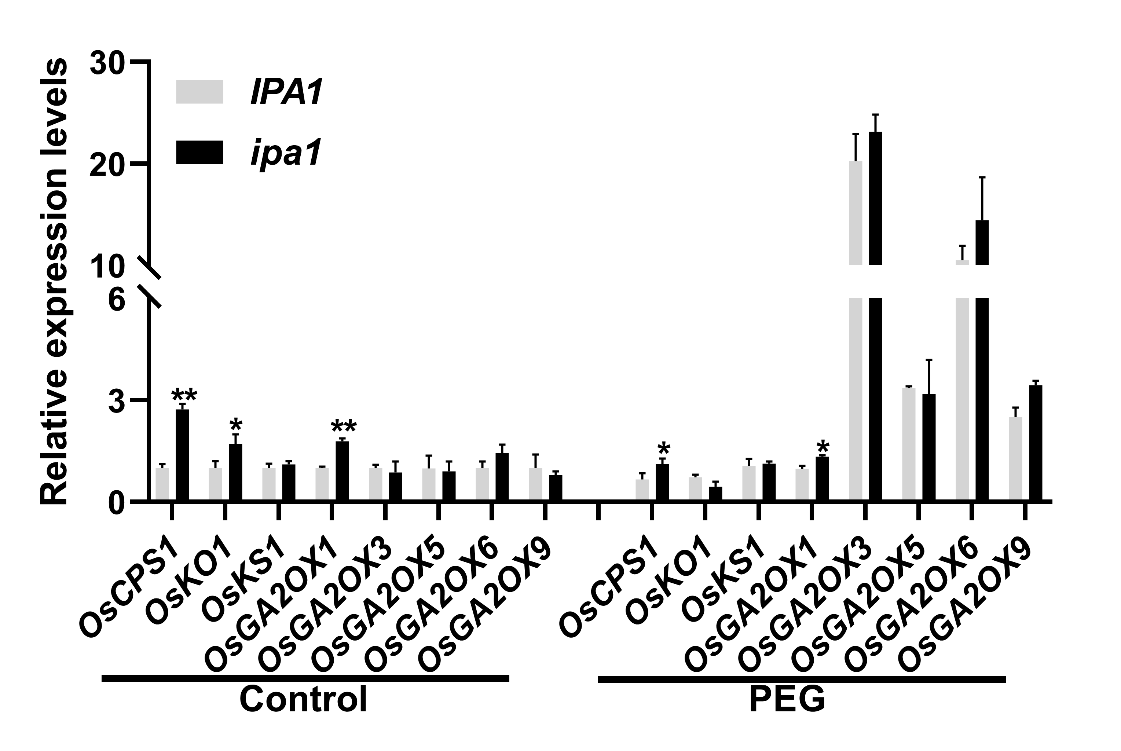


**Supplementary Fig. 6** The expression levels of genes involved in GA biosynthesis and catabolism in the *IPA1*/*ipa1* seedlings under control and 25% PEG treatment for 6 hours. Data represent the means ± SE (n=3). **P*<0.05, *t*-test. ***P*<0.01, *t*-test.


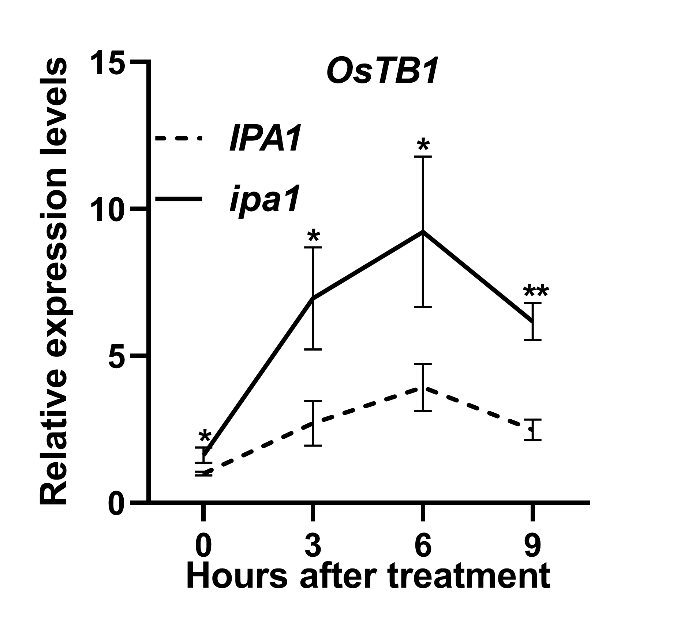


**Supplementary Fig. 7** The expression levels of *OsTB1* in the *IPA1*/*ipa1* seedlings at different time points after 25% PEG treatment.Data represent the means ± SE (n=3). **P*<0.05, *t*-test. ***P*<0.01, *t*-test.
