# Supplementary material for: Ipa1 Improves Rice Drought Tolerance at Seedling Stage Mainly Through Activating Abscisic Acid Pathway
Source: Research Square preprint supplement (doi:10.21203/rs.3.rs-733123/v1), 2021-07-27
Supplement: Supplementary file 2 [file 57fddf6d240febf3ea453221.xlsx]

## Sheet: Sheet1
Supplementary Table 1. Primers used in this study.
Name	Forward primer	Reverse primer	Purpose
IPA1-SBP-AD	GGAGGCCAGTGAATTCCCGCCGCGGTGCCAGGT	TCATCTGCAGCTCGAGCTAGCGTGATGCCAAAGGGG	Yeast One-Hybrid Assay
HOX12-AbAi	ATTCGAGCTCGGTACGTACAGCTCGAGCATGCGCT	GAGCACATGCCTCGAGGGTGAGCCAGTCCTGTGCT
NAC52-AbAi	ATTCGAGCTCGGTACGGCATGATGGGAGGA	GAGCACATGCCTCGACAGGGTCCCCTAGAAT
IPA1-RGV	AGATCCAGTGGGATCATGGAGATGGCCAGTGGAGG	CCGCACTAGTAAGCTCTACAGAGACCAATCCATCGTGTTG	Dual‑luciferase assays
HOX12-LUC	TCGACGGTATCGATAGATCTATAACCCGTTGCTC	TAGAACTAGTGGATCCCTTCCGAGCGAACCCAAAAGA
NAC52-LUC	TCGACGGTATCGATAGGCTCCCTGCTACAACATCAT	TAGAACTAGTGGATCCTCCGAGATAATTAATTCTCTCTCG
AMT1;1	GGTTTCTCTCCCTCTCCGAT	CCACCTTCACACCACACATT	QRT-PCR
AMT1;2	AGGCCATGTCTAGTGGAAC	AACCTGCAGCATCAGATCAA
AMT1;3	GAACGCGACGGACTACC	CTGTGGGACCTGCTTGAG
NRT1.1B	GGCAGGCTCGACTACTTCTA	AGGCGCTTCTCCTTGTAGAC
NRT2.3a	CTCATCCGCGACACCCTC	GATGGAGGAGCAGTACACCG
NRT2.3b	CACGGCACAAAGTACAAGACG	CCCACTGCGGGAAGTAGATG
QNPF2.4	TAGGATTAAGTGGGTGAGG	GTCAAACAGCAAGTAGCG
NR	ACTACCATTACCGCGACAACC	CTCGTTTATCATGTACTCCGGC
NiR	CATCGACGAACTTGGAATGGA	CTCTGCCATTTCTTGTCGATGA
NIA1	TTACAAGGACAACCGCGTCC	GGCGTATCCCTTCATGGTGT
OsGS1;1	GAGTCGTCGTCTCATTTGACCC	GTAGCCACCATCGTTCCTCATC
OsGS1;2	TTTTCAAGGACCCGTTCAGGA	CGGCACTGTGCCTCTTGTTAGT
GS1;3	TCAAGCCATCTTCAGAGACCCA	TACCGGTTGTTCGTCGGAATC
OsGS2	ACCAAGAGTATGCGTGAAGA	AACCTGTCAACCTCCTTTCA
NADH-GOGAT1	GTGCAGCCTGTTGCAGCATAAA	CGGCATTTCACCATGCAAATC
NADH-GOGAT2	CCGATGCGATTGAGAATGAGA	CTTCTTGGCAATGACACCTGC
Fd-GOGAT	GCATACTTGTGAAGCACCGAAGTG	CTGCAAATAGCAACCTAGCGTCAG
GDH1	CATCTGATCATCTCCCTGTT	TTCAGGCAATTCATCACTAC
SLR1	GACGTCAACGAACGCTCAATT	CGGAGTCCAGTCGTCGATCT
TB1	CGGGAGCGGACCAAGGAGAAGA	GGTGGACGATGAGTGGTTCAGGTTG
DEP1	GCGAGATCACGTTCCTCAAG	TGCAGTTTGGCTTACAGCAT
GRF4	AGCAGCAGGCGCTCATATAC	TTCTTGCCGAAGTACGGACC
IPA1	CAAGGGTTCCAAGCAGCGTAA	TGCACCTCATCAAGTGAGAC
OsABA8ox1	AAGCTGGCAAAACCAACATC	CCGTGCTAATACGGAATCCA
OsABA8ox2	CTACTGCTGATGGTGGCTGA	CCCATGGCCTTTGCTTTAT
OsABA8ox3	AGTACAGCCCATTCCCTGTG	ACGCCTAATCAAACCATTGC
OsNCED1	CTCACCATGAAGTCCATGAGGCTT	GTTCTCGTAGTCTTGGTCTTGGCT
OsNCED2	GGTATGGAAACGAGGATAGTGGTT	TGCTTATTGTTGTGCGAGAAGTTC
OsNCED3	CCCCTCCCAAACCATCCAAACCGA	TGTGAGCATATCCTGGCGTCGTGA
OsNCED4	TCCATCTCCTTCTCCCTCCTCCCA	CCTCGCACCCTGCTTGATCTTGCC
OsNCED5	ACATCCGAGCTCCTCGTCGTGAA	TTGGAAGGTGTTTTGGAATGAACCA
OsABI5	AAGAGGTTACATCACAGGAG	GGAGAGGATTGACGACTG
OsLEA3	GCCGTGAATGATTTCCCTTTG	CACACCCGTCAGAAATCCTCC
OsLIP9	TGGAATTTGGAAGTGTTTGGC	CCCACACGAAACACAAACTTC
OsRAB16A	CATGGACAAGATCAAGGAGAAGC	CTTATTATTCAGGAAGGTGACGTGG
OsNAC5	GTGGACCTCTACAAGTTCAA	CGGCGAGAAGAAGTACCA
OsNAC6	CGAGAAGACCAACTGGAT	CAACCTGAGGCTGTTCTT
OsNAC19	GGGTGCTGTGTCGGCTGTA	CGACTGCGACGTAACCATGT
OsNAC52	CCCGAGATGCGTGTAGGAA	GAGAGAAATACGCCCAGATCGA
HOX12	CCTCACCTACATGAGTGAGTACG	GCTGAATTGGTCGTAGACCCC
OsCPS1	TCAAGAGACACCGCCAGTTC	ACAGTGCATGACCCTGGATG
OsKS1	CTCGATCAGCTGCCATTTGC	GCGGGCTTCAGACAATTCAC
OsKO1	AACCCGCCTCCAGCTGTT	CAACTACGGAAGAAGCCCCG
OsGA2ox1	ACCCGCAGATCCTTAGCTTG	TGAACCCACATCTCCTTGCC
OsGA2ox3	ACTCGTTGCAGGTTCTGACC	GTGGCAATGGTGCAATCCTC
OsGA2ox5	GATGCCCATTACCGGAGCTT	AAGCGGTGCAGTCCAATCTT
OsGA2ox6	GGCTATCGGTGGCCTACTTC	TTGTCCTGACGTCTTCCTGC
OsGA2ox9	AGCACAGGGTGATGACGAAC	CCTTGTAAGGGGAAGGCTCC
Actin	CCGAGCGGGAAATTGTGAG	CTATGAAGGAAGGCTGGAAGAGG

## Sheet: Sheet2
Name	Forward primer	Reverse primer	Purpose
IPA1-SBP-AD	GGAGGCCAGTGAATTCCCGCCGCGGTGCCAGGT	TCATCTGCAGCTCGAGCTAGCGTGATGCCAAAGGGG	Yeast One-Hybrid Assay
WS12-BD	ATTCGAGCTCGGTACAAACGATCGGGCTGTGAAGT	GAGCACATGCCTCGATGTACGGTTTCTCCTTTACTTTTGG
WS3-BD	ATTCGAGCTCGGTACAGTGACTGTGGGATCAGGGA	GAGCACATGCCTCGAAACTACGAGACAAGCGACCG
WS4-BD	ATTCGAGCTCGGTACACTTTCCCACCCATCCGAG	GAGCACATGCCTCGACGGTCGGGATGGATCGTC
NAC52-BD	ATTCGAGCTCGGTACGGCATGATGGGAGGA	GAGCACATGCCTCGACAGGGTCCCCTAGAAT
IPA1-RGV	AGATCCAGTGGGATCATGGAGATGGCCAGTGGAGG	CCGCACTAGTAAGCTCTACAGAGACCAATCCATCGTGTTG	Dual‑luciferase assays
WRKY51-LUC	TCGACGGTATCGATAAACGATCGGGCTGTGAAGTT	TAGAACTAGTGGATCCGCCTCCTCCTCCGC
NAC52-LUC	TCGACGGTATCGATAGGCTCCCTGCTACAACATCAT	TAGAACTAGTGGATCCTCCGAGATAATTAATTCTCTCTCG
AMT1;1	GGTTTCTCTCCCTCTCCGAT	CCACCTTCACACCACACATT	QRT-PCR
AMT1;2	AGGCCATGTCTAGTGGAAC	AACCTGCAGCATCAGATCAA
AMT1;3	GAACGCGACGGACTACC	CTGTGGGACCTGCTTGAG
NRT1.1B	GGCAGGCTCGACTACTTCTA	AGGCGCTTCTCCTTGTAGAC
NRT2.3a	CTCATCCGCGACACCCTC	GATGGAGGAGCAGTACACCG
NRT2.3b	CACGGCACAAAGTACAAGACG	CCCACTGCGGGAAGTAGATG
QNPF2.4	TAGGATTAAGTGGGTGAGG	GTCAAACAGCAAGTAGCG
NR	ACTACCATTACCGCGACAACC	CTCGTTTATCATGTACTCCGGC
NiR	CATCGACGAACTTGGAATGGA	CTCTGCCATTTCTTGTCGATGA
NIA1	TTACAAGGACAACCGCGTCC	GGCGTATCCCTTCATGGTGT
OsGS1;1	GAGTCGTCGTCTCATTTGACCC	GTAGCCACCATCGTTCCTCATC
OsGS1;2	TTTTCAAGGACCCGTTCAGGA	CGGCACTGTGCCTCTTGTTAGT
GS1;3	TCAAGCCATCTTCAGAGACCCA	TACCGGTTGTTCGTCGGAATC
OsGS2	ACCAAGAGTATGCGTGAAGA	AACCTGTCAACCTCCTTTCA
NADH-GOGAT1	GTGCAGCCTGTTGCAGCATAAA	CGGCATTTCACCATGCAAATC
NADH-GOGAT2	CCGATGCGATTGAGAATGAGA	CTTCTTGGCAATGACACCTGC
Fd-GOGAT	GCATACTTGTGAAGCACCGAAGTG	CTGCAAATAGCAACCTAGCGTCAG
GDH1	CATCTGATCATCTCCCTGTT	TTCAGGCAATTCATCACTAC
SLR1	GACGTCAACGAACGCTCAATT	CGGAGTCCAGTCGTCGATCT
TB1	CGGGAGCGGACCAAGGAGAAGA	GGTGGACGATGAGTGGTTCAGGTTG
DEP1	GCGAGATCACGTTCCTCAAG	TGCAGTTTGGCTTACAGCAT
GRF4	AGCAGCAGGCGCTCATATAC	TTCTTGCCGAAGTACGGACC
IPA1	CAAGGGTTCCAAGCAGCGTAA	TGCACCTCATCAAGTGAGAC
OsABA8ox1	AAGCTGGCAAAACCAACATC	CCGTGCTAATACGGAATCCA
OsABA8ox2	CTACTGCTGATGGTGGCTGA	CCCATGGCCTTTGCTTTAT
OsABA8ox3	AGTACAGCCCATTCCCTGTG	ACGCCTAATCAAACCATTGC
OsNCED1	CTCACCATGAAGTCCATGAGGCTT	GTTCTCGTAGTCTTGGTCTTGGCT
OsNCED2	GGTATGGAAACGAGGATAGTGGTT	TGCTTATTGTTGTGCGAGAAGTTC
OsNCED3	CCCCTCCCAAACCATCCAAACCGA	TGTGAGCATATCCTGGCGTCGTGA
OsNCED4	TCCATCTCCTTCTCCCTCCTCCCA	CCTCGCACCCTGCTTGATCTTGCC
OsNCED5	ACATCCGAGCTCCTCGTCGTGAA	TTGGAAGGTGTTTTGGAATGAACCA
OsABI5	AAGAGGTTACATCACAGGAG	GGAGAGGATTGACGACTG
OsLEA3	GCCGTGAATGATTTCCCTTTG	CACACCCGTCAGAAATCCTCC
OsLIP9	TGGAATTTGGAAGTGTTTGGC	CCCACACGAAACACAAACTTC
OsRAB16A	CATGGACAAGATCAAGGAGAAGC	CTTATTATTCAGGAAGGTGACGTGG
OsNAC5	GTGGACCTCTACAAGTTCAA	CGGCGAGAAGAAGTACCA
OsNAC6	CGAGAAGACCAACTGGAT	CAACCTGAGGCTGTTCTT
OsNAC52	CCCTCGGGACCGCAAGTA	TCGGCACAGGACCCAATC
OsNAC19	GGGTGCTGTGTCGGCTGTA	CGACTGCGACGTAACCATGT
OsCPS1	TCAAGAGACACCGCCAGTTC	ACAGTGCATGACCCTGGATG
OsKS1	CTCGATCAGCTGCCATTTGC	GCGGGCTTCAGACAATTCAC
OsKO1	AACCCGCCTCCAGCTGTT	CAACTACGGAAGAAGCCCCG
OsKAO	CTCCTTCGTGTCCTTCCGTC	ACCACAGCTGAACCTTCCAC
OsGA20ox1	TTCTTCCTCTGCCCGGAGAT	CATGTCGGCCCTGTAGTGG
OsGA3ox2	CTTCTGTGACGTGATGGAGGAG	CTCAAGAACAACCTCAGCAACTC
OsGA2ox1	ACCCGCAGATCCTTAGCTTG	TGAACCCACATCTCCTTGCC
OsGA2ox2	TGTTTGGTTGAGGGGTGAGT	CATTTTCCCCGATCAGTTGGT
OsGA2ox3	ACTCGTTGCAGGTTCTGACC	GTGGCAATGGTGCAATCCTC
OsGA2ox5	GATGCCCATTACCGGAGCTT	AAGCGGTGCAGTCCAATCTT
OsGA2ox6	GGCTATCGGTGGCCTACTTC	TTGTCCTGACGTCTTCCTGC
OsGA2ox9	AGCACAGGGTGATGACGAAC	CCTTGTAAGGGGAAGGCTCC
WRKY51	GGTGAAGAAGAGTGAGAATTAGCTTG	AAAGCTCAGTCTCAAAGTCTCCTAAAA
WRKY71	TTGGCTCAGCTTGACATCGT	AAGGCTGGGTGCTAATCCAC
Actin	CCGAGCGGGAAATTGTGAG	CTATGAAGGAAGGCTGGAAGAGG
